# Supplementary material for: Noble-metal-free nickel phosphide modified CdS/C3N4 nanorods for dramatically enhanced photocatalytic hydrogen evolution under visible light irradiation
Source: Royal Society of Chemistry journal article supplement (doi:10.1039/c7dt02929b), 2017-01-01
Supplement: c7dt02929b1.pdf [file c7dt02929b1.pdf]

## Supporting Information

# **Noble-metal-free nickel phosphide modified CdS/C<sub>3</sub>N<sub>4</sub> nanorods for dramatically enhanced photocatalytic hydrogen evolution under visible light irradiation**

**Tengfei Wu, Peifang Wang\*, Jin Qian, Yanhui Ao\*, Chao Wang, Jun Hou**

Key Laboratory of Integrated Regulation and Resource Development on Shallow Lakes, Ministry  
of Education, College of Environment, Hohai University, No.1, Xikang road, Nanjing, 210098,  
China

Tel.: +86 25 83787330. Fax: +86 25 83787330.

E-mail address: [andyao@hhu.edu.cn](mailto:andyao@hhu.edu.cn) (Yanhui Ao), [pfwang2005@hhu.edu.cn](mailto:pfwang2005@hhu.edu.cn) (Peifang Wang)

---

\* Corresponding author. Tel./ fax: +86 25 83787330,

E-mail address: [andyao@hhu.edu.cn](mailto:andyao@hhu.edu.cn) (Yanhui Ao), [pfwang2005@hhu.edu.cn](mailto:pfwang2005@hhu.edu.cn) (Peifang Wang)

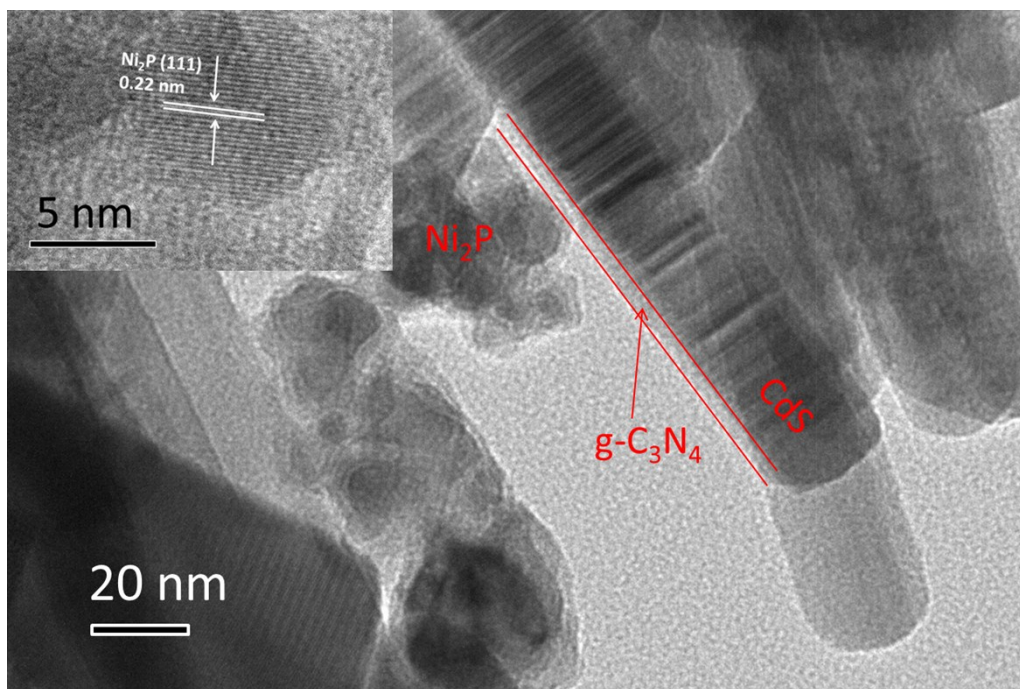

**Figure S1.** TEM image of 5 %Ni<sub>2</sub>P-CdS/g-C<sub>3</sub>N<sub>4</sub> (the insert is the corresponding HRTEM image of Ni<sub>2</sub>P)

Table S1 Comparison of photocatalytic H<sub>2</sub> evolution activities of Ni<sub>2</sub>P-CdS/g-C<sub>3</sub>N<sub>4</sub> with other similar systems.

| catalyst                                              | Light source<br>(wavelength) | Scavenger                                             | H <sub>2</sub> evolution rate<br>( $\mu\text{mol g}^{-1} \text{h}^{-1}$ ) | Ref.      |
|-------------------------------------------------------|------------------------------|-------------------------------------------------------|---------------------------------------------------------------------------|-----------|
| Ni <sub>2</sub> P-CdS/g-C <sub>3</sub> N <sub>4</sub> | 300 W Xe lamp<br>(> 400 nm)  | Na <sub>2</sub> S<br>+Na <sub>2</sub> SO <sub>3</sub> | 44450                                                                     | This work |
| CdS/g-C <sub>3</sub> N <sub>4</sub> /CuS              | 350 W Xe lamp<br>(> 420 nm)  | Na <sub>2</sub> S<br>+Na <sub>2</sub> SO <sub>3</sub> | 1152                                                                      | S 1       |
| CdS/Au/g-C <sub>3</sub> N <sub>4</sub>                | 300 W Xe lamp<br>(> 420 nm)  | methanol                                              | 19.02                                                                     | S 2       |
| Ni(OH) <sub>2</sub> -CdS/rGO                          | 300 W Xe lamp<br>(> 420 nm)  | Na <sub>2</sub> S<br>+Na <sub>2</sub> SO <sub>3</sub> | 4731                                                                      | S 3       |
| Ni@NiO/CdS/g-C <sub>3</sub> N <sub>4</sub>            | 300 W Xe lamp<br>(> 420 nm)  | triethanolamine                                       | 1258.7                                                                    | S 4       |
| g-C <sub>3</sub> N <sub>4</sub> -CdS-NiS              | 300 W Xe lamp<br>(> 420 nm)  | triethanolamine                                       | 2563                                                                      | S 5       |
| Au/ZnO/CdS                                            | 300 W Xe lamp<br>(> 420 nm)  | Na <sub>2</sub> S<br>+Na <sub>2</sub> SO <sub>3</sub> | 608                                                                       | S 6       |
| CoO <sub>x</sub> -TiO <sub>2</sub> /CdS               | 300 W Xe lamp<br>(> 400 nm)  | Na <sub>2</sub> S<br>+Na <sub>2</sub> SO <sub>3</sub> | 660                                                                       | S 7       |

## References

- [S1] F. Cheng, H. Yin, Q. Xiang, Low-temperature solid-state preparation of ternary CdS/g-C<sub>3</sub>N<sub>4</sub>/CuS nanocomposites for enhanced visible-light photocatalytic H<sub>2</sub>-production activity, *Applied Surface Science*, 391 (2017) 432-439.
- [S2] X. L. Ding, Y. X. Li, J. Zhao, Y. Z. Zhu, Y. Li, W.Y. Deng, C. Y. Wang, Enhanced photocatalytic H<sub>2</sub> evolution over CdS/Au/g-C<sub>3</sub>N<sub>4</sub> composite photocatalyst under visible-light irradiation, *Apl Materials*, 3 (2015) 104410.
- [S3] Z. P. Yan, X. G. Yu, A. Han, P. Xu, P. W. Du, Noble-metal-free Ni(OH)<sub>2</sub>-modified CdS/reduced graphene oxide nanocomposite with enhanced photocatalytic activity for hydrogen production under visible light irradiation, *The Journal of Physical Chemistry C*, 118 (2014) 22896-22903.
- [S4] X. Yue, S. Yi, R. Wang, Z. Zhang, S. Qiu, Cadmium Sulfide and Nickel Synergetic Co-catalysts Supported on Graphitic Carbon Nitride for Visible-Light-Driven Photocatalytic Hydrogen Evolution, *Scientific Reports*, 6 (2016) 22268-22276.
- [S5] J. Yuan, J. Wen, Y. Zhong, X. Li, Y. Fang, S. Zhang, W. Liu, Enhanced photocatalytic H<sub>2</sub> evolution over noble-metal-free NiS cocatalyst modified CdS nanorods/g-C<sub>3</sub>N<sub>4</sub> heterojunctions, *Journal of Materials Chemistry A*, 3 (2015) 18244-18255.
- [S6] Z.B. Yu, Y.P. Xie, G. Liu, G.Q. Lu, X.L. Ma, H.M. Cheng, Self-assembled CdS/Au/ZnO heterostructure induced by surface polar charges for efficient photocatalytic hydrogen evolution, *Journal of Materials Chemistry A*, 1 (2013) 2773-2776.

[S7] Z. Yan, H. Wu, A. Han, X. Yu, P. Du, Noble metal-free cobalt oxide (CoO<sub>x</sub>) nanoparticles loaded on titanium dioxide/cadmium sulfide composite for enhanced photocatalytic hydrogen production from water, *International Journal of Hydrogen Energy*, 39 (2014) 13353-13360.
